# Supplementary material for: Removal of lead from aqueous solution using electrospun nanofibers: preparation, characterization, adsorption isotherm, and kinetic study
Source: Royal Society of Chemistry journal article supplement (doi:10.1039/d2ay00691j), 2022-01-01
Supplement: d2ay00691j1.pdf [file d2ay00691j1.pdf]

PVA

|       | qe (mg/g) | Ce (mg/L)   | Ce/qe     |          | log Ce   | ln qe     | ln Ce     | 1/qe       | 1/Ce        | $\epsilon^2$ |
|-------|-----------|-------------|-----------|----------|----------|-----------|-----------|------------|-------------|--------------|
| 25 °C | 50        | 0,065       | 0,0013    | 1,69897  | -1,18709 | 3,912023  | -2,733368 | 0,02       | 15,38461538 | 14322053     |
|       | 67,99     | 6,402       | 0,09416   | 1,832445 | 0,806316 | 4,219361  | 1,8566104 | 0,014708   | 0,156201187 | 7078,2664    |
|       | 141,5     | 21,7        | 0,15336   | 2,150756 | 1,33646  | 4,9523    | 3,0773123 | 0,0070671  | 0,046082949 | 630,04137    |
|       | 230,88333 | 46,17666667 | 0,2       | 2,363393 | 1,664423 | 5,441913  | 3,8324746 | 0,0043312  | 0,021655959 | 139,83845    |
|       | 560       | 138         | 0,24643   | 2,748188 | 2,139879 | 6,327937  | 4,9272537 | 0,0017857  | 0,007246377 | 15,703836    |
|       | 2500      | 250         | 0,1       | 3,39794  | 2,39794  | 7,824046  | 5,5214609 | 0,0004     | 0,004       | 4,7882353    |
| 35 °C | 49,905    | 0,062       | 0,00124   | 1,69814  | -1,2076  | 3,91012   | -2,7806   | 0,02004    | 16,12903226 | 15054837     |
|       | 86        | 2,8         | 0,03256   | 1,9345   | 0,44716  | 4,45435   | 1,02962   | 0,01163    | 0,357142857 | 35558,17     |
|       | 161,7     | 17,66       | 0,10921   | 2,20871  | 1,24699  | 5,08574   | 2,8713    | 0,00618    | 0,056625142 | 949,2218     |
|       | 247,5     | 50,5        | 0,20404   | 2,39358  | 1,70329  | 5,51141   | 3,92197   | 0,00404    | 0,01980198  | 116,9648     |
|       | 395       | 171         | 0,43291   | 2,5966   | 2,233    | 5,97889   | 5,14166   | 0,00253    | 0,005847953 | 10,23051     |
|       | 512,5     | 397,5       | 0,77561   | 2,70969  | 2,59934  | 6,2393    | 5,98519   | 0,00195    | 0,002515723 | 1,894587     |
| 45 °C | 49,53     | 0,09        | 0,0018171 | 1,694868 | -1,04576 | 3,9025785 | -2,407946 | 0,02018978 | 11,11111111 | 9963835      |
|       | 82,4      | 3,52        | 0,0427184 | 1,915927 | 0,546543 | 4,4115854 | 1,258461  | 0,01213592 | 0,284090909 | 22824,2      |
|       | 120       | 26          | 0,2166667 | 2,079181 | 1,414973 | 4,7874917 | 3,2580965 | 0,00833333 | 0,038461538 | 439,564      |
|       | 248,6     | 50,28       | 0,2022526 | 2,395501 | 1,701395 | 5,5158452 | 3,9176074 | 0,00402253 | 0,019888624 | 117,988      |

|       |       |           |          |          |           |           |            |             |         |
|-------|-------|-----------|----------|----------|-----------|-----------|------------|-------------|---------|
| 414   | 167,2 | 0,4038647 | 2,617    | 2,223236 | 6,025866  | 5,1191907 | 0,00241546 | 0,005980861 | 10,7005 |
| 644,5 | 371,1 | 0,5757952 | 2,809223 | 2,569491 | 6,4684748 | 5,9164716 | 0,00155159 | 0,002694691 | 2,17366 |

PVA-Mst(%2)

|       | qe (mg/g) | Ce (mg/L) | Ce/qe    | log qe  | log Ce       | ln qe      | ln Ce   | 1/qe    | 1/Ce        | $\epsilon^2$ |
|-------|-----------|-----------|----------|---------|--------------|------------|---------|---------|-------------|--------------|
| 25 °C | 46,41     | 0,718     | 0,015471 | 1,66661 | -0,14388     | 3,83751495 | -0,3313 | 0,02155 | 1,39275766  | 448567       |
|       | 80        | 4         | 0,05     | 1,90309 | 0,60206      | 4,38202663 | 1,38629 | 0,0125  | 0,25        | 17794,7      |
|       | 191,7     | 11,66     | 0,060824 | 2,28262 | 1,066699     | 5,25593165 | 2,45616 | 0,00522 | 0,085763293 | 2164,53      |
|       | 269,25    | 46,15     | 0,171402 | 2,43016 | 1,664172     | 5,59564032 | 3,8319  | 0,00371 | 0,021668472 | 140          |
|       | 480       | 154       | 0,320833 | 2,68124 | 2,187521     | 6,1737861  | 5,03695 | 0,00208 | 0,006493506 | 12,6122      |
|       | 815       | 337       | 0,413497 | 2,91116 | 2,52763      | 6,70318811 | 5,82008 | 0,00123 | 0,002967359 | 2,63565      |
| 35 °C | 50        | 0,012     | 0,00024  | 1,69897 | -1,920818754 | 3,91202    | -4,4228 | 0,02    | 83,33333333 | 58954489     |
|       | 96,555    | 0,689     | 0,00714  | 1,98477 | -0,161780778 | 4,57011    | -0,3725 | 0,01036 | 1,45137881  | 482382,5     |
|       | 197,5     | 10,5      | 0,05316  | 2,29557 | 1,021189299  | 5,28574    | 2,35138 | 0,00506 | 0,095238095 | 2664,06      |
|       | 321       | 35,8      | 0,11153  | 2,50651 | 1,553883027  | 5,77144    | 3,57795 | 0,00312 | 0,027932961 | 232,3506     |
|       | 741,25    | 101,75    | 0,13727  | 2,86996 | 2,007534418  | 6,60834    | 4,62252 | 0,00135 | 0,00982801  | 28,8711      |
|       | 1000      | 300       | 0,3      | 3       | 2,477121255  | 6,90776    | 5,70378 | 0,001   | 0,003333333 | 3,325622     |

PVA

|       |         |        |         |         |         |             |         |         |             |          |
|-------|---------|--------|---------|---------|---------|-------------|---------|---------|-------------|----------|
| 45 °C | 50      | 0,0267 | 0,00053 | 1,69897 | -1,5735 | 3,912023005 | -3,6231 | 0,02    | 37,45318352 | 32896024 |
|       | 98,6    | 0,28   | 0,00284 | 1,99388 | -0,5528 | 4,591071262 | -1,273  | 0,01014 | 3,571428571 | 2141261  |
|       | 201,875 | 9,625  | 0,04768 | 2,30508 | 0,9834  | 5,307648694 | 2,26436 | 0,00495 | 0,103896104 | 3164,871 |
|       | 329     | 34,2   | 0,10395 | 2,5172  | 1,53403 | 5,796057751 | 3,53223 | 0,00304 | 0,029239766 | 254,531  |
|       | 678     | 96,52  | 0,14236 | 2,83123 | 1,98462 | 6,519147288 | 4,56975 | 0,00147 | 0,010360547 | 32,08114 |
|       | 1237,5  | 363,7  | 0,2939  | 3,09255 | 2,56074 | 7,120848494 | 5,89633 | 0,00081 | 0,002749519 | 2,262983 |

|       | Süre (min) | qe (mg/g) | qd-qt  | ln(qd-qt) | t/qt    | ln t    | t 1/2   | 1/t     | 1/qt    | log(qd-qt)   |
|-------|------------|-----------|--------|-----------|---------|---------|---------|---------|---------|--------------|
| 25 °C | 10         | 35,925    | 13,875 | 2,63009   | 0,27836 | 2,30259 | 3,16228 | 0,1     | 0,02784 | 1,142232992  |
|       | 20         | 43        | 6,8    | 1,91692   | 0,46512 | 2,99573 | 4,47214 | 0,05    | 0,02326 | 0,832508913  |
|       | 30         | 43,35     | 6,45   | 1,86408   | 0,69204 | 3,4012  | 5,47723 | 0,03333 | 0,02307 | 0,809559715  |
|       | 45         | 44,55     | 5,25   | 1,65823   | 1,0101  | 3,80666 | 6,7082  | 0,02222 | 0,02245 | 0,720159303  |
|       | 60         | 49,1      | 0,7    | -0,3567   | 1,222   | 4,09434 | 7,74597 | 0,01667 | 0,02037 | -0,15490196  |
|       | 90         | 49,8      | 0      | 0         | 1,80723 | 4,49981 | 9,48683 | 0,01111 | 0,02008 | 0            |
|       | 120        | 50        | -0,2   | -1,6094   | 2,4     | 4,78749 | 10,9545 | 0,00833 | 0,02    | -0,698970004 |
|       | 150        | 49,85     | -0,05  | -2,9957   | 3,00903 | 5,01064 | 12,2474 | 0,00667 | 0,02006 | -1,301029996 |

|       |    |        |        |         |         |         |         |         |           |         |
|-------|----|--------|--------|---------|---------|---------|---------|---------|-----------|---------|
| 35 °C | 10 | 32,355 | 17,395 | 2,85618 | 0,30907 | 2,30259 | 3,16228 | 0,1     | 0,0309071 | 1,24042 |
|       | 20 | 32,635 | 17,115 | 2,83996 | 0,61284 | 2,99573 | 4,47214 | 0,05    | 0,0306419 | 1,23338 |
|       | 30 | 38,8   | 10,95  | 2,39334 | 0,7732  | 3,4012  | 5,47723 | 0,03333 | 0,0257732 | 1,03941 |
|       | 45 | 45,7   | 4,05   | 1,39872 | 0,98468 | 3,80666 | 6,7082  | 0,02222 | 0,0218818 | 0,60746 |

|     |        |       |         |         |         |         |         |           |         |
|-----|--------|-------|---------|---------|---------|---------|---------|-----------|---------|
| 60  | 49,135 | 0,615 | -0,4861 | 1,22113 | 4,09434 | 7,74597 | 0,01667 | 0,0203521 | -0,2111 |
| 90  | 49,75  | 0     | 0       | 1,80905 | 4,49981 | 9,48683 | 0,01111 | 0,0201005 | 0       |
| 120 | 50     | -0,25 | -1,3863 | 2,4     | 4,78749 | 10,9545 | 0,00833 | 0,02      | 0,60206 |
| 150 | 50     | -0,25 | -1,3863 | 3       | 5,01064 | 12,2474 | 0,00667 | 0,02      | 0,60206 |

---

|     |       |       |           |          |           |          |         |         |           |
|-----|-------|-------|-----------|----------|-----------|----------|---------|---------|-----------|
| 10  | 35,1  | 14,43 | 2,6693094 | 0,2849   | 2,3025851 | 3,162278 | 0,1     | 0,02849 | 1,1592663 |
| 20  | 35,95 | 13,58 | 2,6085981 | 0,556328 | 2,9957323 | 4,472136 | 0,05    | 0,02782 | 1,1328998 |
| 30  | 38,05 | 11,48 | 2,4406064 | 0,788436 | 3,4011974 | 5,477226 | 0,03333 | 0,02628 | 1,0599419 |
| 45  | 38,6  | 10,93 | 2,3915113 | 1,165803 | 3,8066625 | 6,708204 | 0,02222 | 0,02591 | 1,0386202 |
| 60  | 46,2  | 3,33  | 1,2029723 | 1,298701 | 4,0943446 | 7,745967 | 0,01667 | 0,02165 | 0,5224442 |
| 90  | 47,75 | 1,78  | 0,5766134 | 1,884817 | 4,4998097 | 9,486833 | 0,01111 | 0,02094 | 0,25042   |
| 120 | 49,53 | 0     | 0         | 2,422774 | 4,7874917 | 10,95445 | 0,00833 | 0,02019 | 0         |
| 150 | 49,68 | -0,15 | -1,89712  | 3,019324 | 5,0106353 | 12,24745 | 0,00667 | 0,02013 | -0,823909 |

---

|       | Süre (min) | qe (mg/g) | qd-qt  | ln(qd-qt)  | t/qt       | lnt        | t 1/2      | 1/t        | 1/qt       | log(qd-qt)   |
|-------|------------|-----------|--------|------------|------------|------------|------------|------------|------------|--------------|
| 25 °C | 10         | 35,535    | 13,3   | 2,58776    | 0,28141    | 2,30259    | 3,16228    | 0,1        | 0,02814    | 1,123851641  |
|       | 20         | 41,935    | 6,9    | 1,93152    | 0,47693    | 2,99573    | 4,47214    | 0,05       | 0,02385    | 0,838849091  |
|       | 30         | 44,69     | 4,145  | 1,4219     | 0,67129    | 3,4012     | 5,47723    | 0,03333    | 0,02238    | 0,617524535  |
|       | 45         | 44,745    | 4,09   | 1,40854    | 1,0057     | 3,80666    | 6,7082     | 0,02222    | 0,02235    | 0,611723308  |
|       | 60         | 48,835    | 0      | 0          | 1,22863    | 4,09434    | 7,74597    | 0,01667    | 0,02048    | 0            |
|       | 90         | 48,87     | -0,035 | -3,3524    | 1,84162    | 4,49981    | 9,48683    | 0,01111    | 0,02046    | -1,455931956 |
|       | 120        | 48,55     | 0,285  | -1,2553    | 2,47168    | 4,78749    | 10,9545    | 0,00833    | 0,0206     | -0,54515514  |
|       | 150        | 48,565    | 0,27   | -1,3093    | 3,08864    | 5,01064    | 12,2474    | 0,00667    | 0,02059    | -0,568636236 |
| 35 °C | 10         | 42,89     | 7,11   | 1,9615     | 0,23315    | 2,30259    | 3,16228    | 0,1        | 0,0233155  | 0,8518696    |
|       | 20         | 44,225    | 5,775  | 1,75354    | 0,45223    | 2,99573    | 4,47214    | 0,05       | 0,0226116  | 0,76155199   |
|       | 30         | 45,025    | 4,975  | 1,60443    | 0,6663     | 3,4012     | 5,47723    | 0,03333    | 0,0222099  | 0,69679309   |
|       | 45         | 45        | 5      | 1,60944    | 1          | 3,80666    | 6,7082     | 0,02222    | 0,0222222  | 0,69897      |
|       | 60         | 45        | 5      | 1,60944    | 1,33333    | 4,09434    | 7,74597    | 0,01667    | 0,0222222  | 0,69897      |
|       | 90         | 50        | 0      | 0          | 1,8        | 4,49981    | 9,48683    | 0,01111    | 0,02       | 0            |
|       | 120        | 50        | 0      | 0          | 2,4        | 4,78749    | 10,9545    | 0,00833    | 0,02       | 0            |
|       | 150        | 50        | 0      | 0          | 3          | 5,01064    | 12,2474    | 0,00667    | 0,02       | 0            |
| 45 °C | 10         | 36,005    | 13,995 | 2,63870012 | 0,2777392  | 2,30258509 | 3,16227766 | 0,1        | 0,02777392 | 1,1459729    |
|       | 20         | 41,755    | 8,245  | 2,10960696 | 0,47898455 | 2,99573227 | 4,47213595 | 0,05       | 0,02394923 | 0,91619066   |
|       | 30         | 50        | 0      | 0          | 0,6        | 3,40119738 | 5,47722558 | 0,03333333 | 0,02       | 0            |
|       | 45         | 50        | 0      | 0          | 0,9        | 3,80666249 | 6,70820393 | 0,02222222 | 0,02       | 0            |
|       | 60         | 50        | 0      | 0          | 1,2        | 4,09434456 | 7,74596669 | 0,01666667 | 0,02       | 0            |
|       | 90         | 50        | 0      | 0          | 1,8        | 4,49980967 | 9,48683298 | 0,01111111 | 0,02       | 0            |
|       | 120        | 50        | 0      | 0          | 2,4        | 4,78749174 | 10,9544512 | 0,00833333 | 0,02       | 0            |
|       | 150        | 50        | 0      | 0          | 3          | 5,01063529 | 12,2474487 | 0,00666667 | 0,02       | 0            |
